# Supplementary material for: Involvement of mechano-sensitive Piezo1 channel in the differentiation of brown adipocytes
Source: PubMed Central journal article supplement (PMC10717802; doi:10.1186/s12576-022-00837-1), 2022-06-20

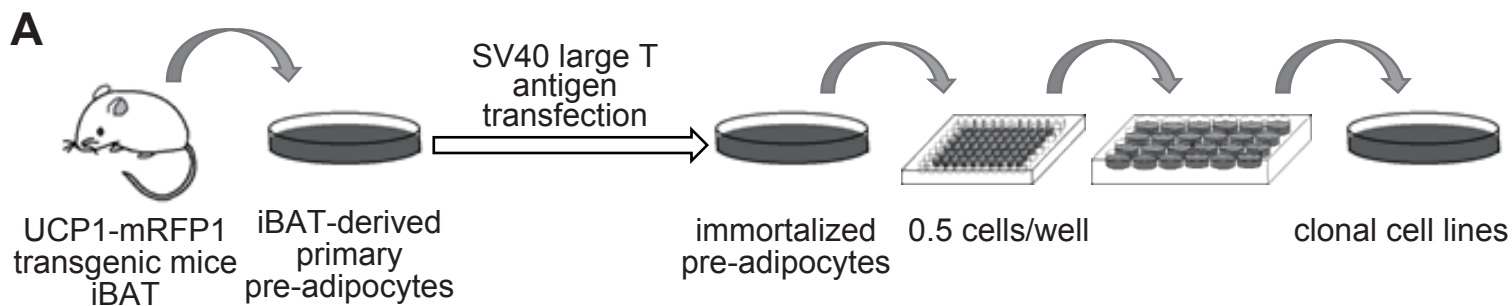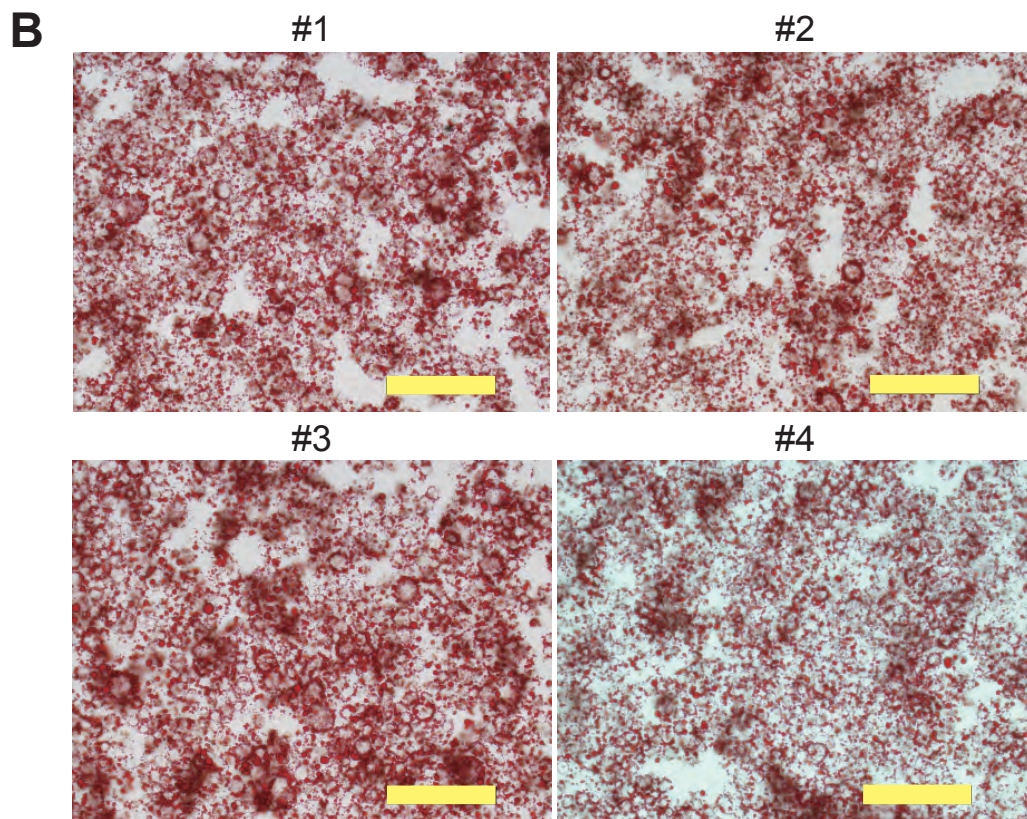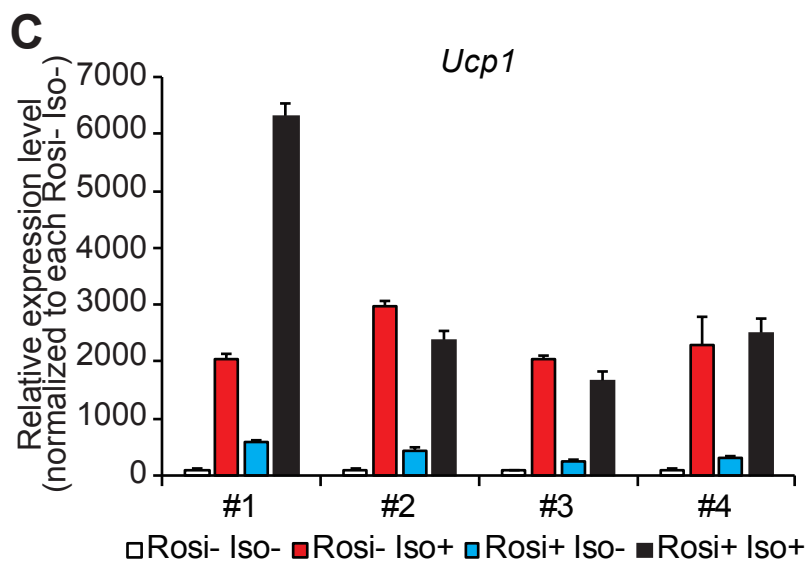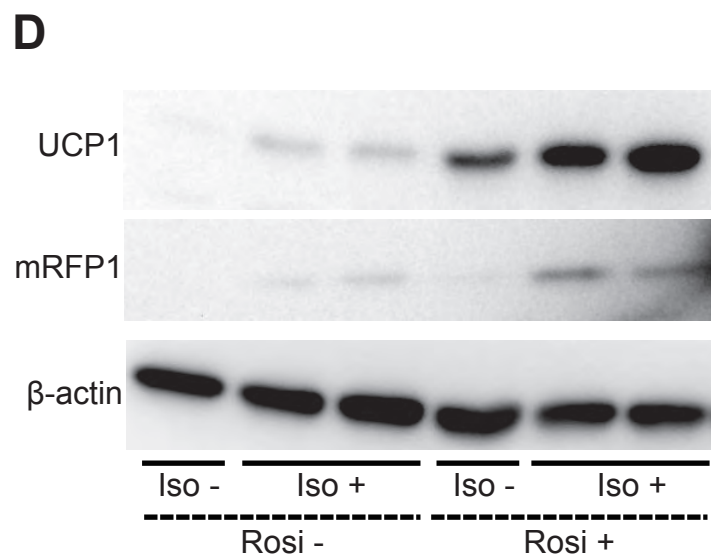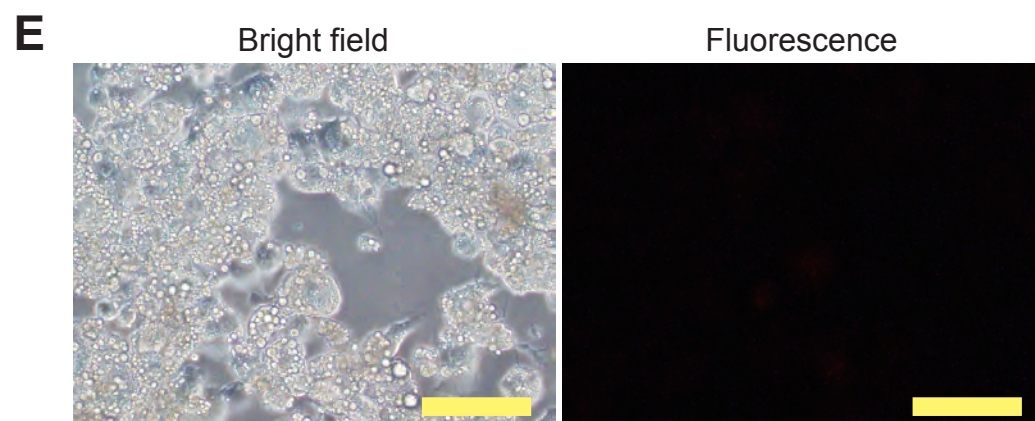

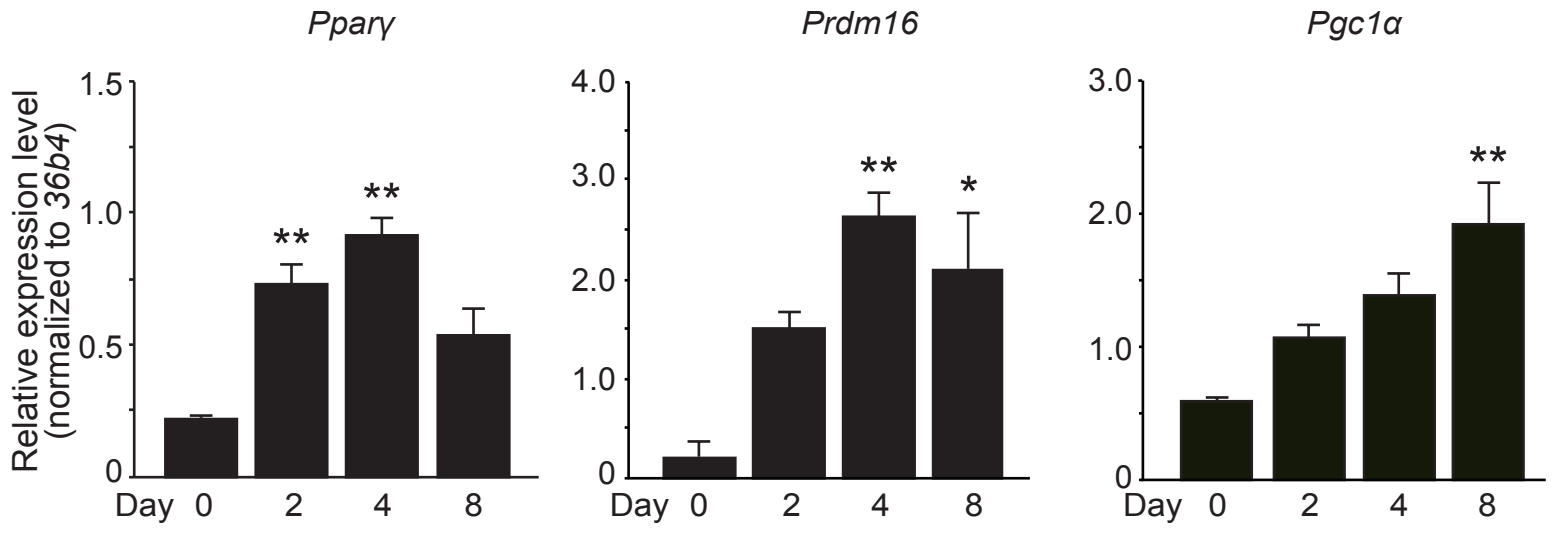

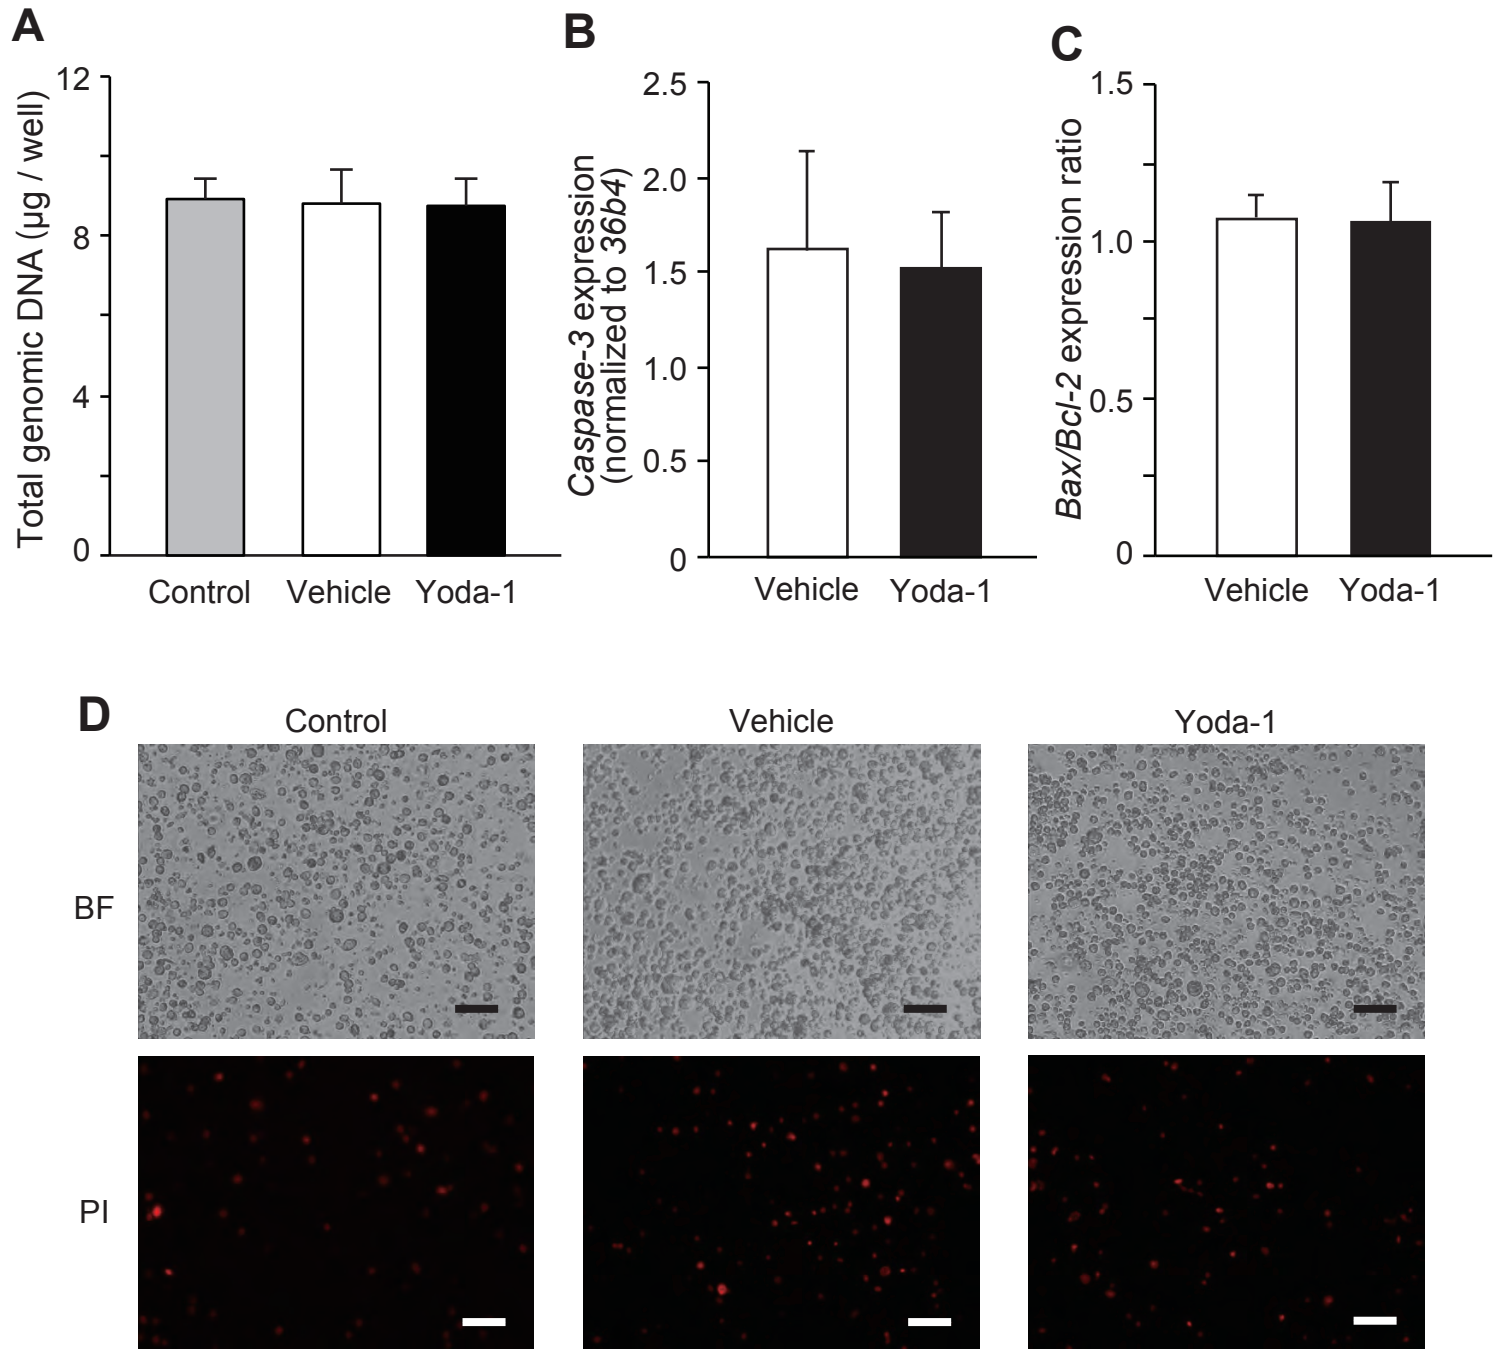

Supplement: 12576_2022_837_MOESM1_ESM.pdf [file 12576_2022_837_MOESM1_ESM.pdf]
